# Supplementary material
Source: publisher site journal article supplement (https://www.dovepress.com/article/231218)
Supplement: Supplementary file 1 [file get_supplementary_file.php]

**Table S1 Prostate cancer specimens and protein expression**

| Specimens | Gleason Score | Shh protein | AR protein | GRP78 protein |
|-----------|---------------|-------------|------------|---------------|
| PC1       | G2            | -           | -          | -             |
| PC2       | G2            | -           | -          | -             |
| PC3       | G2            | -           | -          | -             |
| PC4       | G2            | -           | -          | -             |
| PC5       | G2            | -           | -          | +             |
| PC6       | G2            | -           | +          | -             |
| PC7       | G2            | +           | +          | -             |
| PC8       | G2            | -           | -          | -             |
| PC9       | G2            | -           | -          | -             |
| PC10      | G2            | -           | -          | -             |
| PC11      | G2            | -           | -          | +             |
| PC12      | G3            | -           | +          | -             |
| PC13      | G3            | -           | -          | -             |
| PC14      | G3            | +           | +          | -             |
| PC15      | G3            | +           | +          | -             |
| PC16      | G3            | -           | +          | -             |
| PC17      | G3            | +           | +          | -             |
| PC18      | G3            | +           | +          | +             |
| PC19      | G3            | -           | +          | -             |
| PC20      | G3            | -           | +          | +             |
| PC21      | G3            | -           | -          | -             |
| PC22      | G3            | -           | -          | +             |
| PC23      | G3            | -           | +          | +             |
| PC24      | G3            | +           | -          | -             |
| PC25      | G3            | -           | -          | -             |
| PC26      | G3            | +           | +          | -             |
| PC27      | G3            | -           | -          | -             |
| PC28      | G3            | -           | -          | -             |
| PC29      | G3            | -           | -          | -             |
| PC30      | G3            | -           | -          | +             |
| PC31      | G3            | -           | -          | -             |
| PC32      | G3            | -           | -          | -             |
| PC33      | G3            | -           | -          | -             |

|      |    |   |   |   |
|------|----|---|---|---|
| PC34 | G3 | - | - | - |
| PC35 | G3 | - | - | - |
| PC36 | G3 | - | + | - |
| PC37 | G3 | - | + | + |
| PC38 | G3 | - | + | - |
| PC39 | G3 | + | + | - |
| PC40 | G3 | + | + | + |
| PC41 | G3 | - | - | - |
| PC42 | G3 | - | + | + |
| PC43 | G3 | - | - | - |
| PC44 | G3 | - | - | - |
| PC45 | G3 | + | - | - |
| PC46 | G3 | - | - | + |
| PC47 | G3 | + | + | + |
| PC48 | G3 | - | + | + |
| PC49 | G3 | - | - | - |
| PC50 | G3 | + | + | - |
| PC51 | G3 | + | - | - |
| PC52 | G3 | - | - | - |
| PC53 | G3 | - | - | - |
| PC54 | G3 | - | - | - |
| PC55 | G3 | - | + | + |
| PC56 | G3 | - | - | - |
| PC57 | G3 | - | - | - |
| PC58 | G3 | - | - | - |
| PC59 | G3 | + | + | + |
| PC60 | G3 | - | - | - |
| PC61 | G3 | - | - | - |
| PC62 | G3 | - | - | - |
| PC63 | G3 | - | - | + |
| PC64 | G3 | - | - | - |
| PC65 | G3 | - | - | - |
| PC66 | G3 | - | + | - |
| PC67 | G3 | - | - | - |
| PC68 | G3 | - | - | + |
| PC69 | G3 | - | - | - |

|       |    |   |   |    |
|-------|----|---|---|----|
| PC70  | G3 | - | + | +  |
| PC71  | G3 | + | + | -  |
| PC72  | G3 | - | - | -  |
| PC73  | G3 | - | - | -  |
| PC74  | G3 | + | + | +  |
| PC75  | G3 | + | + | -  |
| PC76  | G3 | + | - | -  |
| PC77  | G3 | + | - | +  |
| PC78  | G3 | - | - | -  |
| PC79  | G3 | + | + | +  |
| PC80  | G3 | - | + | +- |
| PC81  | G3 | - | - | -  |
| PC82  | G3 | + | + | -  |
| PC83  | G3 | - | - | -  |
| PC84  | G3 | - | + | -  |
| PC85  | G3 | + | + | +  |
| PC86  | G3 | - | - | -  |
| PC87  | G3 | + | + | -  |
| PC88  | G3 | - | - | -  |
| PC89  | G3 | + | + | +  |
| PC90  | G3 | + | + | -  |
| PC91  | G3 | - | + | +  |
| PC92  | G3 | - | - | -  |
| PC93  | G3 | + | + | -  |
| PC94  | G3 | + | + | +  |
| PC95  | G3 | - | - | +  |
| PC96  | G3 | - | - | -  |
| PC97  | G3 | + | + | +  |
| PC98  | G3 | - | - | +  |
| PC99  | G3 | - | - | +  |
| PC100 | G3 | + | - | -  |
| PC101 | G3 | + | + | -  |
| PC102 | G3 | - | + | +  |
| PC103 | G3 | - | - | -  |
| PC104 | G3 | + | + | +  |
| PC105 | G3 | - | - | -  |

|       |    |   |   |   |
|-------|----|---|---|---|
| PC106 | G4 | + | - | + |
| PC107 | G4 | + | + | + |
| PC108 | G4 | - | + | - |
| PC109 | G4 | - | - | - |
| PC110 | G4 | + | + | - |
| PC112 | G4 | + | - | + |
| PC113 | G4 | + | - | - |
| PC114 | G4 | + | + | - |
| PC115 | G4 | - | - | - |
| PC116 | G4 | + | - | + |
| PC117 | G4 | + | + | + |
| PC118 | G4 | - | - | - |
| PC119 | G4 | - | - | - |
| PC120 | G4 | + | + | - |
| PC121 | G4 | - | - | + |
| PC122 | G4 | - | - | - |
| PC123 | G4 | + | + | - |
| PC124 | G4 | + | + | + |
| PC125 | G4 | + | + | - |
| PC126 | G4 | - | - | + |
| PC127 | G4 | + | + | - |
| PC128 | G4 | - | - | + |
| PC129 | G4 | + | - | + |
| PC130 | G4 | + | + | + |
| PC131 | G4 | - | - | - |
| PC132 | G4 | + | + | + |
| PC133 | G4 | + | + | + |
| PC134 | G4 | + | + | - |
| PC135 | G4 | + | - | + |
| PC136 | G4 | - | - | - |
| PC137 | G4 | + | + | + |
| PC138 | G4 | + | + | + |
| PC139 | G4 | + | + | - |
| PC140 | G4 | + | + | + |
| PC141 | G4 | - | + | - |
| PC142 | G4 | - | + | - |

|       |    |   |   |   |
|-------|----|---|---|---|
| PC143 | G4 | - | + | + |
| PC144 | G4 | - | - | - |
| PC145 | G4 | + | + | - |
| PC146 | G4 | - | - | - |
| PC147 | G4 | + | + | + |
| PC148 | G4 | - | + | + |
| PC149 | G4 | - | - | - |
| PC150 | G4 | - | - | - |
| PC151 | G4 | - | - | + |
| PC152 | G4 | + | + | - |
| PC153 | G4 | - | - | - |
| PC154 | G4 | - | - | - |
| PC155 | G4 | - | - | - |
| PC156 | G4 | - | + | + |
| PC157 | G4 | + | + | + |
| PC158 | G4 | - | - | - |
| PC159 | G4 | + | + | + |
| PC160 | G4 | - | - | - |
| PC161 | G4 | - | - | + |
| PC162 | G4 | + | + | + |
| PC163 | G4 | - | - | - |
| PC164 | G4 | + | + | + |
| PC165 | G4 | - | + | - |
| PC166 | G4 | + | + | + |
| PC167 | G4 | + | + | + |
| PC168 | G4 | - | + | - |
| PC169 | G4 | + | + | + |
| PC170 | G4 | + | + | - |
| PC171 | G4 | - | - | + |
| PC172 | G4 | + | + | + |
| PC173 | G4 | - | - | - |
| PC174 | G4 | + | + | - |
| PC175 | G4 | + | + | + |
| PC176 | G4 | - | - | + |
| PC177 | G4 | + | + | - |
| PC178 | G4 | - | + | - |

|       |    |   |   |   |
|-------|----|---|---|---|
| PC179 | G4 | + | + | + |
| PC180 | G4 | + | - | - |
| PC181 | G4 | + | + | - |
| PC182 | G4 | - | - | - |
| PC183 | G4 | + | - | - |
| PC184 | G4 | + | + | - |
| PC185 | G4 | + | - | - |
| PC186 | G4 | + | + | + |
| PC187 | G4 | - | - | - |
| PC188 | G4 | + | + | - |
| PC189 | G4 | + | - | - |
| PC190 | G4 | - | + | + |
| PC191 | G4 | + | + | + |
| PC192 | G4 | + | - | - |
| PC193 | G4 | - | - | - |
| PC194 | G4 | - | + | - |
| PC195 | G4 | + | + | - |
| PC196 | G4 | + | - | - |
| PC197 | G4 | + | + | - |
| PC198 | G4 | - | - | - |
| PC199 | G4 | + | + | - |
| PC200 | G4 | + | - | - |
| PC201 | G4 | + | + | + |
| PC202 | G4 | + | + | - |
| PC203 | G5 | + | - | - |
| PC204 | G5 | - | + | - |
| PC205 | G5 | + | + | + |
| PC206 | G5 | - | - | + |
| PC207 | G5 | + | + | - |
| PC208 | G5 | + | + | + |
| PC209 | G5 | + | + | - |
| PC210 | G5 | - | - | + |
| PC211 | G5 | + | - | - |
| PC212 | G5 | + | + | + |
| PC213 | G5 | + | + | - |
| PC214 | G5 | - | - | - |

| Specimens |    | Shh protein | AR protein | GRP78 protein |
|-----------|----|-------------|------------|---------------|
| PC215     | G5 | -           | -          | -             |
| PC216     | G5 | +           | +          | +             |
| PC217     | G5 | +           | -          | +             |
| PC218     | G5 | +           | +          | -             |
| PC219     | G5 | +           | +          | +             |
| PC220     | G5 | -           | +          | +             |
| PC221     | G5 | -           | -          | -             |
| PC222     | G5 | +           | +          | +             |
| PC223     | G5 | +           | +          | -             |
| PC224     | G5 | -           | +          | +             |
| PC225     | G5 | +           | +          | +             |
| PC226     | G5 | -           | -          | -             |
| PC227     | G5 | +           | +          | -             |
| PC228     | G5 | +           | -          | -             |
| PC229     | G5 | -           | -          | -             |
| PC230     | G5 | +           | +          | +             |
| PC231     | G5 | -           | -          | -             |
| PC232     | G5 | +           | +          | +             |
| PC233     | G5 | -           | -          | +             |
| PC234     | G5 | +           | +          | +             |
| PC235     | G5 | +           | +          | -             |
| PC236     | G5 | -           | -          | -             |
| PC237     | G5 | +           | +          | -             |
| PC238     | G5 | -           | -          | -             |
| PC239     | G5 | +           | +          | +             |
| PC240     | G5 | -           | +          | +             |
| PC241     | G5 | -           | -          | +             |
| PC242     | G5 | +           | +          | +             |
| PC243     | G5 | -           | -          | -             |
| PC244     | G5 | +           | +          | +             |
| PC245     | G5 | +           | +          | +             |
| PC246     | G5 | -           | -          | +             |
| PC247     | G5 | +           | +          | +             |
| PC248     | G5 | +           | +          | -             |
| PC249     | G5 | -           | +          | -             |

|       |    |   |   |   |
|-------|----|---|---|---|
| PC250 | G5 | + | + | + |
| PC251 | G5 | - | - | + |
| PC252 | G5 | - | - | - |
| PC253 | G5 | + | - | + |
| PC254 | G5 | + | + | + |
| PC255 | G5 | + | + | + |
| PC256 | G5 | + | + | - |
| PC257 | G5 | + | + | - |
| PC258 | G5 | + | + | + |
| PC259 | G5 | - | - | - |
| PC260 | G5 | + | + | + |
| PC261 | G5 | - | - | + |
| PC262 | G5 | + | + | + |
| PC263 | G5 | + | + | - |
| PC264 | G5 | + | - | + |
| PC265 | G5 | + | + | + |
| PC266 | G5 | + | + | - |
| PC267 | G5 | - | + | + |
| PC268 | G5 | + | - | - |
| PC269 | G5 | + | + | + |
| PC270 | G5 | - | + | + |
| PC271 | G5 | + | + | + |
| PC272 | G5 | + | + | - |
| PC273 | G5 | + | + | + |
| PC274 | G5 | - | + | + |
| PC275 | G5 | + | + | + |
| PC276 | G5 | - | - | - |
| PC277 | G5 | + | + | - |
| PC278 | G5 | - | + | + |
| PC279 | G5 | + | + | + |
| PC280 | G5 | + | - | + |
| PC281 | G5 | + | + | - |
| PC282 | G5 | + | + | + |
| PC283 | G5 | - | - | - |
| PC284 | G5 | + | + | - |
| PC285 | G5 | + | - | + |



|       |    |   |   |   |
|-------|----|---|---|---|
| PC286 | G5 | + | + | + |
| PC287 | G5 | + | + | - |
| PC288 | G5 | + | + | + |
| PC289 | G5 | - | - | - |
| PC290 | G5 | + | + | - |
| PC291 | G5 | + | + | + |
| PC292 | G5 | + | + | - |
| PC293 | G5 | + | + | + |
| PC294 | G5 | + | - | + |
| PC295 | G5 | + | + | + |
| PC296 | G5 | - | + | + |
| PC297 | G5 | + | + | + |
| PC298 | G5 | - | - | - |
| PC299 | G5 | - | + | + |
| PC300 | G5 | - | - | + |
| PC301 | G5 | + | + | - |
| PC302 | G5 | + | + | + |
| PC303 | G5 | - | - | + |
| PC304 | G5 | + | + | + |
| PC305 | G5 | + | - | + |
| PC306 | G5 | - | - | + |
| PC307 | G5 | + | + | + |
| PC308 | G5 | + | + | - |
| PC309 | G5 | + | + | + |
| PC310 | G5 | - | + | - |
| PC311 | G5 | + | + | - |
| PC312 | G5 | + | + | + |
| PC313 | G5 | - | - | - |
| PC314 | G5 | + | + | + |
| PC315 | G5 | - | + | + |
| PC316 | G5 | + | + | + |
| PC317 | G5 | + | - | + |
| PC318 | G5 | - | + | + |
| PC319 | G5 | - | - | - |
| PC320 | G5 | + | + | - |
| PC321 | G5 | + | + | + |

|       |    |   |   |   |
|-------|----|---|---|---|
| PC322 | G5 | + | + | + |
| PC323 | G6 | + | + | - |
| PC324 | G6 | + | + | + |
| PC325 | G6 | + | + | + |
| PC326 | G6 | - | - | + |
| PC327 | G6 | + | + | - |
| PC328 | G6 | + | + | + |
| PC329 | G6 | + | - | + |
| PC330 | G6 | + | + | + |
| PC331 | G6 | + | - | - |
| PC332 | G6 | + | + | - |
| PC333 | G6 | + | + | - |
| PC334 | G6 | + | + | + |
| PC335 | G6 | + | + | + |
| PC336 | G6 | + | + | + |
| PC337 | G6 | - | + | + |
| PC338 | G6 | + | - | + |
| PC339 | G6 | + | - | - |
| PC340 | G6 | + | + | + |
| PC341 | G6 | + | + | + |
| PC342 | G6 | + | + | + |
| PC343 | G6 | - | - | - |
| PC344 | G6 | + | - | + |
| PC345 | G6 | + | + | - |
| PC346 | G6 | + | + | + |
| PC347 | G6 | + | - | - |
| PC348 | G6 | + | + | + |
| PC349 | G6 | - | - | - |
| PC350 | G6 | + | + | + |
| PC351 | G6 | + | - | + |
| PC352 | G6 | + | + | + |
| PC353 | G6 | + | + | - |
| PC354 | G6 | + | - | + |
| PC355 | G6 | + | + | + |
| PC356 | G6 | + | + | + |
| PC357 | G6 | + | + | - |

|       |    |   |   |   |
|-------|----|---|---|---|
| PC358 | G6 | + | + | + |
| PC359 | G6 | - | - | + |
| PC360 | G6 | + | + | + |
| PC361 | G6 | - | - | - |
| PC362 | G6 | - | + | - |
| PC363 | G6 | + | + | - |
| PC364 | G6 | + | - | + |
| PC365 | G6 | - | - | + |
| PC366 | G6 | + | + | - |
| PC367 | G6 | + | - | + |
| PC368 | G6 | + | + | - |
| PC369 | G6 | + | + | + |
| PC370 | G6 | + | + | - |
| PC371 | G6 | + | + | + |
| PC372 | G6 | + | + | - |
| PC373 | G6 | + | + | + |
| PC374 | G6 | + | + | + |
| PC375 | G6 | - | - | + |
| PC376 | G6 | - | + | - |
| PC377 | G6 | + | + | + |
| PC378 | G6 | - | - | - |
| PC379 | G6 | + | + | - |
| PC380 | G6 | + | + | + |
| PC381 | G6 | - | - | + |
| PC382 | G6 | + | - | + |
| PC383 | G6 | + | + | + |
| PC384 | G6 | - | - | + |
| PC385 | G6 | - | + | - |
| PC386 | G6 | + | - | - |
| PC387 | G6 | - | - | + |
| PC388 | G6 | + | + | + |
| PC389 | G6 | - | + | + |
| PC390 | G6 | + | + | - |
| PC391 | G6 | + | + | + |
| PC392 | G6 | + | + | - |
| PC393 | G6 | + | - | - |

|       |    |   |   |   |
|-------|----|---|---|---|
| PC394 | G6 | - | - | + |
| PC395 | G6 | + | + | - |
| PC396 | G6 | + | - | + |
| PC397 | G6 | + | + | + |
| PC398 | G6 | - | - | - |
| PC399 | G6 | - | + | + |
| PC400 | G7 | + | + | + |
| PC401 | G7 | - | + | + |
| PC402 | G7 | + | + | + |
| PC403 | G7 | - | + | + |
| PC404 | G7 | - | - | + |
| PC405 | G7 | + | + | + |
| PC406 | G7 | + | + | + |
| PC407 | G7 | - | + | + |
| PC408 | G7 | - | - | - |
| PC409 | G7 | + | + | + |
| PC410 | G7 | + | + | + |
| PC411 | G7 | + | + | - |
| PC412 | G7 | - | + | + |
| PC413 | G7 | + | + | + |
| PC414 | G8 | + | + | + |
| PC415 | G8 | + | + | + |
| PC416 | G8 | + | + | - |
| PC417 | G8 | + | + | + |
| PC418 | G8 | + | + | + |
| PC419 | G8 | + | + | + |
| PC420 | G8 | + | - | + |
| PC421 | G8 | - | - | - |
| PC422 | G8 | + | + | + |
| PC423 | G8 | - | + | + |
| PC424 | G8 | + | + | - |
| PC425 | G8 | - | - | + |
| PC426 | G8 | + | + | + |
| PC427 | G8 | - | + | + |
| PC428 | G8 | + | + | + |
| PC429 | G8 | + | + | - |

|       |     |   |   |   |
|-------|-----|---|---|---|
| PC430 | G9  | + | + | + |
| PC431 | G9  | + | + | + |
| PC432 | G9  | + | + | + |
| PC433 | G9  | + | + | + |
| PC434 | G9  | - | + | - |
| PC435 | G9  | + | + | + |
| PC436 | G9  | + | + | - |
| PC437 | G9  | + | + | + |
| PC438 | G10 | + | + | + |
| PC439 | G10 | + | + | + |
| PC440 | G10 | + | - | + |
| PC441 | G10 | + | + | + |
| PC442 | G10 | + | + | + |
| PC443 | G10 | + | + | + |
